# Supplementary material for: Efficient peroxymonosulfate activation by magnesium-doped Co 3 O 4 for thiacloprid degradation: regulation of Co 2+ /Co 3+ ratios and degradation mechanism
Source: Royal Society of Chemistry journal article supplement (doi:10.1039/d5ra04080a), 2025-01-01
Supplement: d5ra04080a1.pdf [file d5ra04080a1.pdf]

## Supporting Information

### **Efficient peroxymonosulfate activation by magnesium-doped $\text{Co}_3\text{O}_4$ for thiacloprid degradation: Regulation of $\text{Co}^{2+}/\text{Co}^{3+}$ ratios and degradation mechanism**

Hui Fui,<sup>\*a,b</sup> Xinran Ma,<sup>b</sup> Yiping Huang,<sup>b</sup> Shiyao Xi,<sup>b</sup> Zhandong Ren<sup>a,b</sup> and Yuchan Zhu<sup>a,b</sup>

<sup>a</sup> Hubei Province Key Laboratory of Agricultural Waste Resource Utilization, <sup>b</sup> School of Chemistry and Environmental Engineering, Wuhan Polytechnic University, Wuhan 430023, China

\*Corresponding author: HUi Fui: [Feihui509@163.com](mailto:Feihui509@163.com)

### **Text S1. Reuse test.**

To collect and separate the products in the MCO-0.2/PMS process, the reaction volume was increased by 10 times to 1 L of reaction solution containing 100 mg catalyst, 20 mg thiachloprid, 0.4 mmol PMS. After 15 min, the solution was quenched with  $\text{Na}_2\text{S}_2\text{O}_3$  solution and centrifuged to separate the solid and liquid. The solid products were collected and washed with DI and ethanol for three times before the next run.

To track cobalt leaching amount among the reuse tests, sample was withdrawn and quenched with  $\text{Na}_2\text{S}_2\text{O}_3$  solution after each run. Then the quenched samples were centrifuged to separate the solid and liquid. The supernatants were collected and analyzed by Inductively Coupled Plasma-Mass Spectrometry.

### **Text S2. Determine the pH point of zero charge (pH<sub>zpc</sub>).**

Typically, 50 mL of 0.1 M KCl solution at six different pH (3, 5, 7, 9, 11) and 0.01 g of MCO-0.2 catalysts were applied to the determination of pH<sub>zpc</sub>. Then place the prepared solutions on the shaker for 24 h and measured the final pH after 24 h.  $\Delta\text{pH} = \text{pH}_{\text{final}} - \text{pH}_{\text{initial}}$  was calculated and its curve plotted as the X = initial pH and Y =  $\Delta\text{pH}$ . The intersection of the curve with the X-axis is equal to pH<sub>zpc</sub>.

### **Text S3. Quantification of various pollutants.**

The concentration of THIA, ATZ, CAP and PMSO<sub>2</sub> were determined by high performance liquid chromatography (HPLC, Agilent 1260) equipped with a 179 4.6×250 mm column. The mobile phases (v/v) were formic acid (1‰)/acetonitrile (40/60, v/v) for THIA, water/methanol (50/50, v/v) for ATZ, water/methanol (90/10, v/v) for CAP, water/acetonitrile (30/70, v/v) for PMSO<sub>2</sub>. THIA, ATZ, CAP and PMSO<sub>2</sub> were measured at 242, 357, 278, 265 and 265 nm, respectively. MTZ concentration was analyzed with a UV-vis spectrophotometer (UV-3600, Shimadzu, Japan) at 319 nm.

### **Text S4. Quantification of PMS.**

PMS concentration was analyzed using KI spectrophotometry.<sup>1</sup> Briefly, 2 mL of suspension was withdrawn at given time intervals and filtered with a 0.22- $\mu\text{m}$  polytetrafluoroethylene (PTFE) syringe filter immediately. Then, 1.0 mL of filtered sample was added to 4 mL of KI solution (0.5 M, containing 0.05 M  $\text{NaHCO}_3$ ). After reacting for 30 min, the mixture was analyzed by a UV-visible absorption spectrometer (UV-3600, Shimadzu, Japan) at 352 nm.

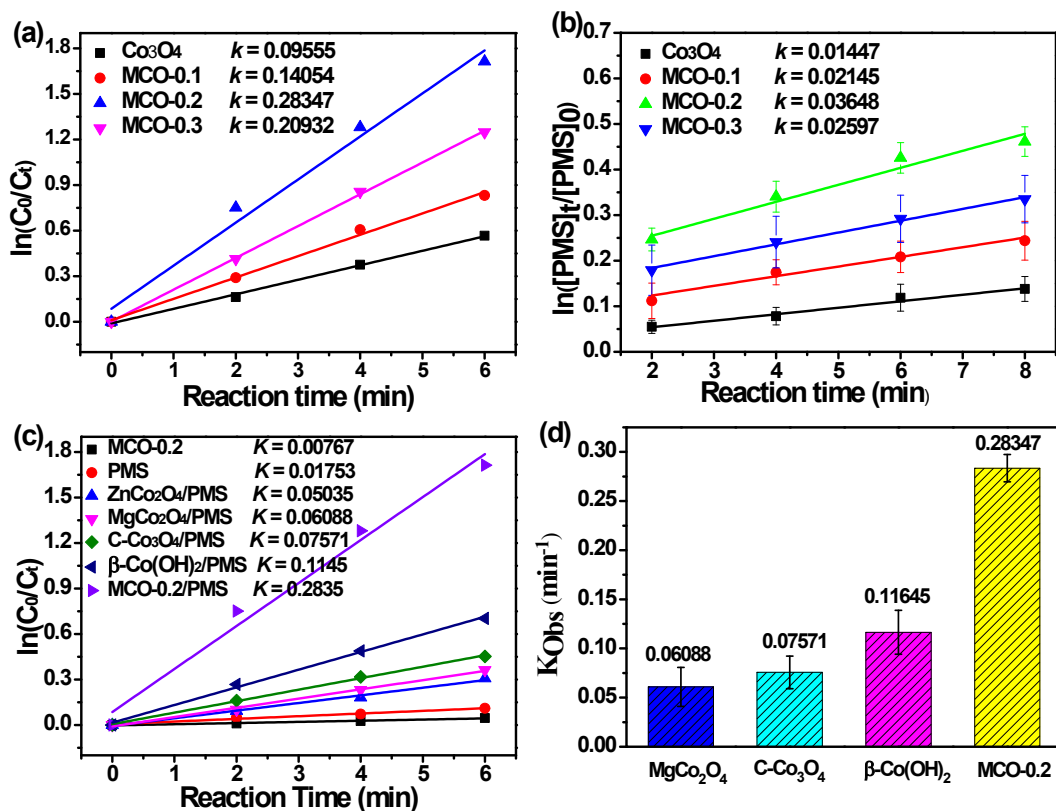

Figure S1. Kinetic curves of (a) THIA removal and (b) PMS depletion over  $\text{Co}_3\text{O}_4$  and MCO-x catalysts; (c) Kinetic curves of THIA removal over MCO-0.2 and other similar catalysts, (d) the corresponding first-order rate constants.

Reaction conditions:  $[\text{THIA}] = 20 \text{ mg/L}$ ,  $[\text{catalyst}] = 100 \text{ g/L}$ ,  $[\text{PMS}] = 0.4 \text{ mM}$ ,  $T = 298 \text{ K}$ ,  $\text{pH} = 7$ .

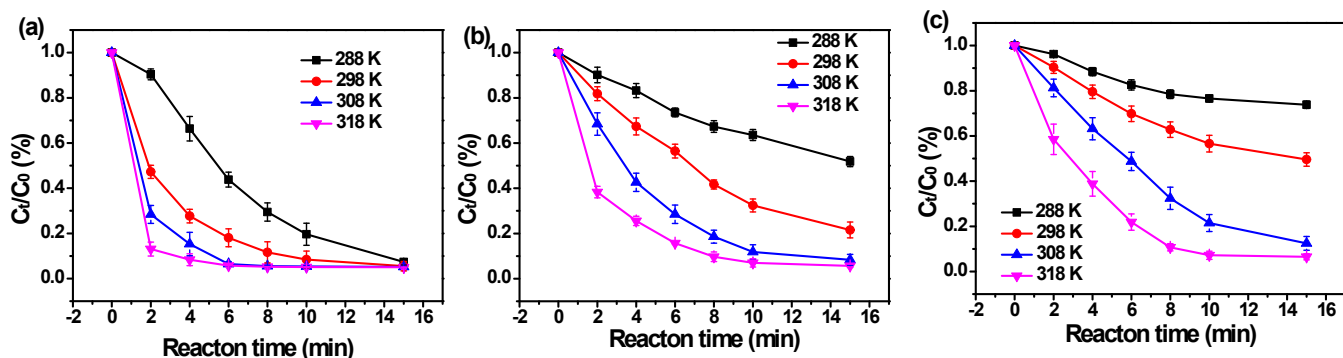

Figure S2. Kinetic curves of THIA removal obtained from different temperatures in (a) MCO-0.2/PMS, (b)  $\beta\text{-Co}(\text{OH})_2/\text{PMS}$  and (c)  $\text{ZnCo}_2\text{O}_4/\text{PMS}$  system. Reaction conditions:  $[\text{THIA}] = 20 \text{ mg/L}$ ,  $[\text{catalyst}] = 100 \text{ g/L}$ ,  $[\text{PMS}] = 0.4 \text{ mM}$ ,  $T = 298 \text{ K}$ ,  $\text{pH} = 7$ .

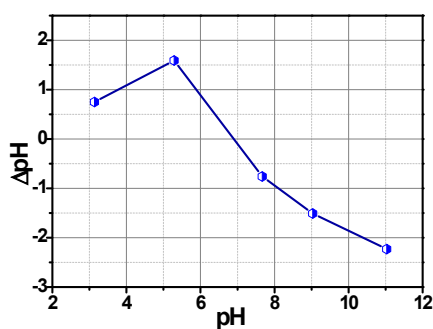

Figure S3. Zeta potential of MCO-0.2 catalysts at different pH.

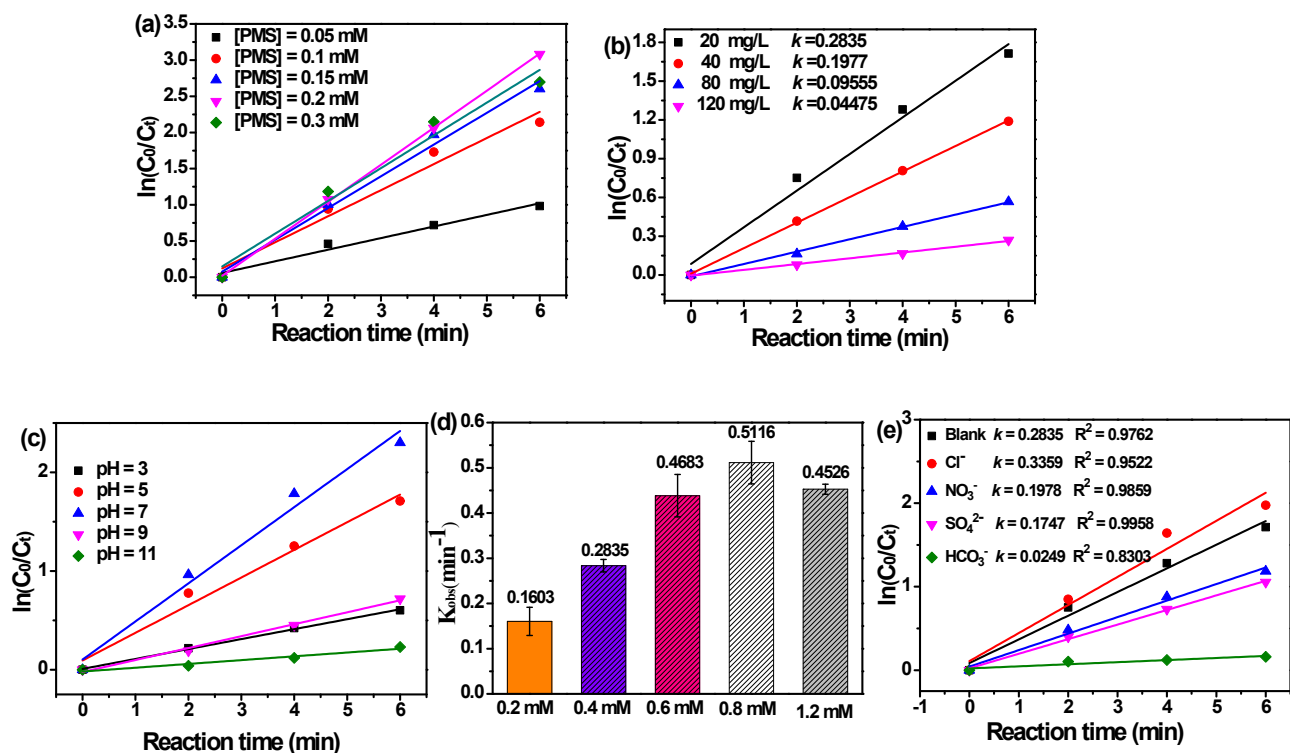

Figure S4. Kinetic curves of THIA removal at different reaction conditions: (a) PMS dosage, (b) THIA concentration, (c, d) initial pH, (e) co-existing anions. Reaction conditions: [THIA] = 20 mg L<sup>-1</sup>, [PMS] = 0.4 mM, [catalyst] = 100 mg L<sup>-1</sup>, T = 298 K and pH = 7.

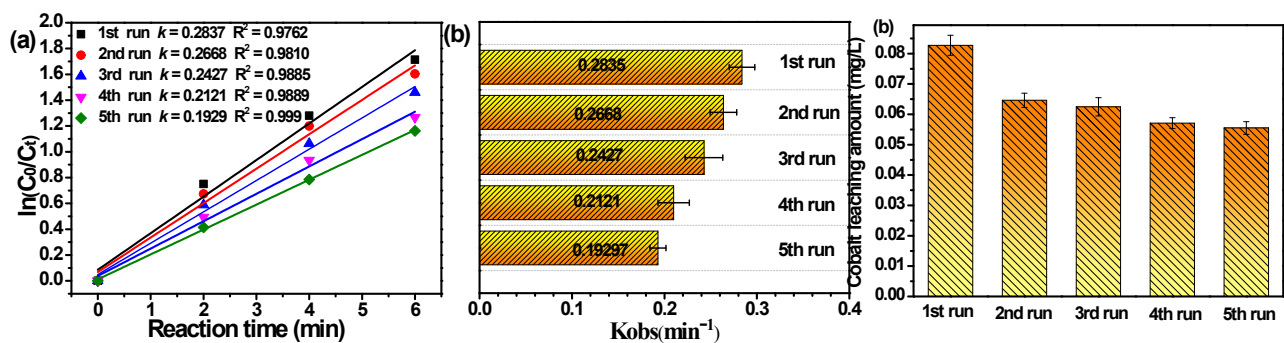

Figure S5. (a) Kinetic curves of THIA removal, (b) the corresponding rate constant and (c) Co leaching in multiple runs with MCO-0.2 catalysts. Reaction conditions: [THIA] = 20 mg/L, [catalyst] = 100 g/L, [PMS] = 0.4 mM, T = 298 K, pH = 7.

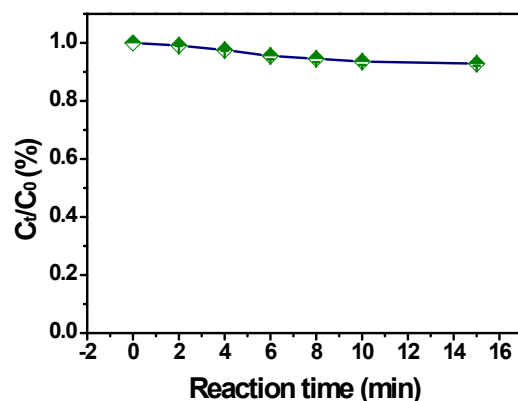

Figure S6. THIA removal during the leaching  $\text{Co}^{2+}$ /PMS process. Reaction conditions:  $[\text{THIA}] = 20 \text{ mg/L}$ ,  $[\text{Co}^{2+}] = 0.08 \text{ mg/L}$ ,  $[\text{PMS}] = 0.4 \text{ mM}$ ,  $T = 298 \text{ K}$ ,  $\text{pH} = 7$ .

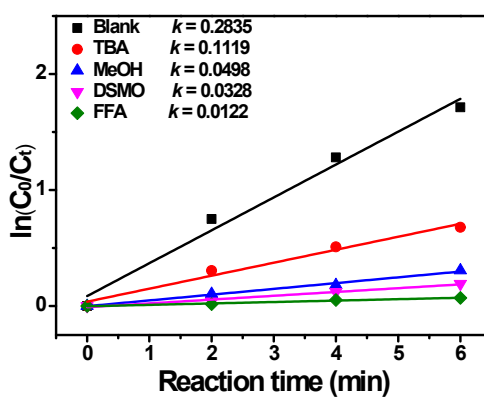

Figure S7. Kinetic curves of THIA removal in the presence of 200 mM quencher. Experimental conditions:  $[\text{THIA}] = 20 \text{ mg/L}$ ,  $[\text{catalyst}] = 100 \text{ mg/L}$ ,  $[\text{PMS}] = 0.4 \text{ mM}$ ,  $T = 298 \text{ K}$ ,  $\text{pH} = 7$ .

Table S1. The second-order rate constants for reactions of the probe contaminants and THIA with  $\bullet\text{OH}$ ,  $\text{SO}_4^{\bullet-}$ ,  $^1\text{O}_2$  and  $\text{Co(IV)}$ , respectively.

| Compound | $k_{\text{PMS}}$ | $k_{\text{SO}_4^{\bullet-}}$ | $k_{\bullet\text{OH}}$ | $k_{^1\text{O}_2}$ | $k_{\text{Co(IV)}}$ | Ref. |
|----------|------------------|------------------------------|------------------------|--------------------|---------------------|------|
| TBA      | No reaction      | $4.0 \times 10^5$            | $6.0 \times 10^8$      | $3.04 \times 10^3$ | $1.0 \times 10^2$   | 2    |
| MeOH     | No reaction      | $1.1 \times 10^7$            | $9.7 \times 10^8$      | $3.89 \times 10^3$ | $6.1 \times 10^3$   | 2    |
| FFA      | 0.011            | $1.3 \times 10^{10}$         | $1.5 \times 10^{10}$   | $1.20 \times 10^8$ | No reaction         | 2, 8 |
| DMSO     | No reaction      | $2.7 \times 10^9$            | $7.0 \times 10^9$      | No reaction        | $2.4 \times 10^6$   | 3    |
| ATZ      | 0.04             | $2.6 \times 10^9$            | $3.0 \times 10^9$      | $4.0 \times 10^4$  |                     | 4, 5 |
| MTZ      | No reaction      | $2.74 \times 10^9$           | $3.54 \times 10^9$     | $3.40 \times 10^8$ |                     | 6, 7 |
| CAP      | 0.08             | $9.1 \times 10^8$            | $1.80 \times 10^9$     | $7.21 \times 10^6$ |                     | 2, 4 |
| THIA     | 0.14             | $4.5 \times 10^9$            | $4.8 \times 10^9$      | $3.9 \times 10^7$  |                     | 2, 8 |

Table S2. Comparison with reported works of other catalyst systems.

| Catalyst                                               | Reaction conditions                                            | Removal efficiency | $K_{\text{obs}}(\text{mol}^{-1})$ | Ref              |
|--------------------------------------------------------|----------------------------------------------------------------|--------------------|-----------------------------------|------------------|
| <b>Iron-Doped Manganese Oxide</b>                      | [catalyst] = 0.04 g/L,<br>[PMS] = 0.5 mM,<br>[BPA] = 1.15 mg/L | 95% in 20 min      | 0.0138                            | 9                |
| <b>Fe<sub>x</sub>Co<sub>3-x</sub>O<sub>4</sub></b>     | [BPA] = 20 mg/L<br>[PMS] = 0.2 g/L,<br>[catalyst] = 0.1 g/L    | 95% in 60 min      | 0.049                             | 10               |
| <b>CoMn<sub>2</sub>O<sub>4</sub></b>                   | [SA] = 10 mg/L<br>[PMS] = 0.1 g/L,<br>[catalyst] = 0.05 g/L    | 100% in 20 min     | 0.155                             | 11               |
| <b>alginate@ZnCo<sub>2</sub>O<sub>4</sub></b>          | [PMS] = 1 g/L,<br>[catalyst] = 1 g/L<br>[RhB] = 25 mg/L        | 98.28% in 40 min   | 0.1459                            | 12               |
| <b>Co<sub>2.98</sub>Al<sub>0.02</sub>O<sub>4</sub></b> | [MNZ] = 10 mg/L,<br>[catalyst] = 0.5 g/L,<br>[PMS] = 1.5 mM    | 100% in 40 min     | 0.127                             | 13               |
| <b>MCO-0.2</b>                                         | [THIA] = 20 mg/L,<br>[catalyst] = 100 mg/L,<br>[PMS] = 0.4 mM  | 94.4% in 15 min    | 0.2835                            | <b>This work</b> |

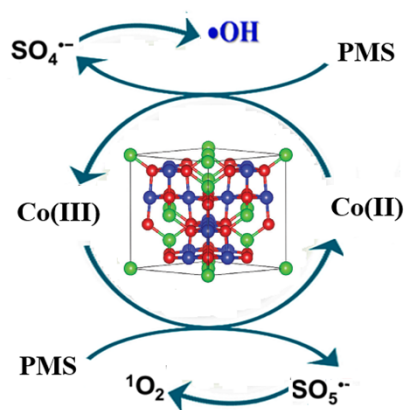

Figure S8. Possible activation mechanism of PMS in MCO-0.2/PMS system.

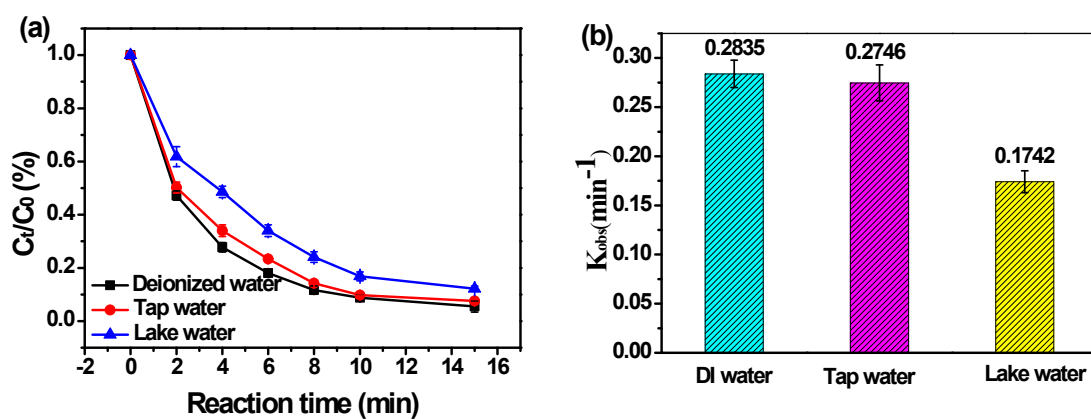

Figure S9. THIA removal in various water conditions. Reaction conditions: [THIA] = 20 mg/L,  $[\text{Co}^{2+}]$  = 0.08 mg/L, [PMS] = 0.4 mM,  $T$  = 298 K, pH = 7.

## References

1. C. J. Liang, C. F. Huang, N. Mohanty and R. M. Kurakalva, A rapid spectrophotometric determination of persulfate anion in ISCO, *Chemosphere*, 2008, 73, 1540-1543.
2. L. Gao, Y. Guo, J. Zhan, G. Yu and Y. Wang, Assessment of the validity of the quenching method for evaluating the role of reactive species in pollutant abatement during the persulfate-based process, *Water Res.*, 2022, 221, 118730.
3. Y. Zong, X. H. Guan, J. Xu, Y. Feng, Y. F. Mao, L. Q. Xu, H. Q. Chu and D. L. Wu, Unraveling the Overlooked Involvement of High-Valent Cobalt-Oxo Species Generated from the Cobalt(II)-Activated Peroxymonosulfate Process, *Environ. Sci. Technol.*, **2020**, 54 (24), 16231-16239.
4. L. Gao, Y. Guo, J. Huang, B. Wang, S. Deng, G. Yu and Y. Wang, Simulating micropollutant abatement during cobalt mediated peroxymonosulfate process by probe-based kinetic models, *Chem. Eng. J.*, 2022, 441, 135970.
5. L. Gao, Y. Guo, J. Zhan, G. Yu and Y. Wang, Assessment of the validity of the quenching method for evaluating the role of reactive species in pollutant abatement during the persulfate-based process, *Water Res.*, 2022, 221, 118730.
6. L. Lian, B. Yao, S. Hou, J. Fang, S. Yan and W. Song, Kinetic study of hydroxyl and sulfate radical-mediated oxidation of pharmaceuticals in wastewater effluents, *Environ. Sci. Technol.*, 2017, 51(5), 2954-2962.
7. Y. Guo, J. Long, J. Huang, G. Yu and Y. Wang, Can the commonly used quenching method really evaluate the role of reactive oxygen species in pollutant abatement during catalytic ozonation? *Water Res.*, 2022, 215, 118275.
8. G. R'ozsa, L. Szab'o, K. Schrantz, E. Tak'acs, L. Wojn'arovits, Mechanistic study on thiacloprid transformation: Free radical reactions. *J. Photoch. Photobio. A: Chem.*, 2017, 343, 17-25.
9. K. Z. Huang and H. C. Zhang, Direct Electron-Transfer-Based Peroxymonosulfate Activation by Iron-Doped Manganese Oxide ( $\delta$ -MnO<sub>2</sub>) and the Development of Galvanic Oxidation Processes (GOPs), *Environ. Sci. Technol.*, 2019, 53, 12610-12620.
10. X. Li, Z. Wang, B. Zhang, A. I. Rykov, M. A. Ahmed and J. Wang, Fe<sub>x</sub>Co<sub>3-x</sub>O<sub>4</sub> nanocages derived from nanoscale metal-organic frameworks for removal of bisphenol A by activation of peroxymonosulfate, *Appl. Catal. B-Environ.*, 2016, 181, 788-799.
11. C. X. Li, C. B. Chen, J. Y. Lu, S. Cui, J. Li, H. Q. Liu, W. W. Li and F. Zhang, Metal organic framework-derived CoMn<sub>2</sub>O<sub>4</sub> catalyst for heterogeneous activation of peroxymonosulfate and sulfanilamide degradation, *Chemical Engineering Journal*, 2018, 337, 101-109.
12. B. E. Channab, M. E. Ouadi, S. E. Marrane, O. A. Layachi, A. E. Idrissi, S. Farsad, D. Mazkad, A. I. BaQais, M. Lasri and H. A. Ahsaine, Alginate@ZnCO<sub>2</sub>O<sub>4</sub> for efficient peroxymonosulfate activation towards effective rhodamine B degradation: optimization using response surface methodology, *RSC Adv.*, 2023, 13, 20150-20163.
13. H. T. Li, Q. Gao, G. S. Wang, B. Han, K. S. Xia, J. P. Wu, C. G. Zhou and J. Dong, Postsynthetic incorporation of catalytically inert Al into Co<sub>3</sub>O<sub>4</sub> for peroxymonosulfate activation and insight into the boosted catalytic performance, *Chemical Engineering Journal*, 2021, 426, 131292.
